1 **Integrating stimulus-organism-response model and theory of planned**  
2 **behavior to explore athletes' intention to receive the COVID-19**  
3 **vaccine booster— A moderated mediation model**

4

5 Wenpeng Zhan<sup>1</sup>, Qianting Deng<sup>2</sup>, Van Bac Nguyen<sup>3</sup>, Tran Phan Duc Anh<sup>3</sup>, Phan Danh Na<sup>3</sup>,  
6 An-Shin Shia<sup>4</sup>, Gordon Chih-Ming Ku<sup>3</sup>

7

- 8 1. College of Sport Science, Lingnan Normal University, Guangdong, China.  
9 2. School of Physical Education and Sports Science, South China Normal  
10 University, Guangdong, China.  
11 3. Department of Sport Management, National Taiwan University of Sport, Taichung  
12 City, Taiwan.  
13 4. Business School, Lingnan Normal University, Guangdong, China.

14

15

16 \*Correspondence author: Gordon Chih-Ming Ku

17 Address: No. 16, Sec. 1, Shuangshi Rd., North Dist., Taichung City 404401 , Taiwan  
18 (R.O.C.)

19 Tel:+886-4- 22213108

20 E-mail: [GordonKu@gm.ntus.edu.tw](mailto:GordonKu@gm.ntus.edu.tw)

21

1 **Integrating stimulus-organism-response model and theory of planned**  
2 **behavior to explore athletes' intention to receive the COVID-19**  
3 **vaccine booster— A moderated mediation model**

4

5 **Abstract**

6

7 This study aims to investigate the factors influencing athletes' intention to receive the  
8 COVID-19 vaccine booster in Mainland China by integrating the stimulus-  
9 organization-response (SOR) model and theory of planned behavior (TPB) as the  
10 theoretical framework. Purposive sampling was used to select respondents from the  
11 National Games of the People's Republic of China. Hard-copy questionnaires were  
12 utilized to collect data, resulting in 981 valid responses. Descriptive analysis and partial  
13 least squares structural equation modeling were used to analyze the data. The findings  
14 reveal that athletes' subjective norm and knowledge significantly influence attitude,  
15 commitment, and perceived behavioral control. Attitude, commitment, and perceived  
16 behavioral control are verified as full mediators between subjective norm, knowledge,  
17 and intention to receive the COVID-19 vaccine booster. Knowledge to commitment is  
18 the most powerful path to predict athletes' intention to receive the COVID-19 vaccine  
19 booster. Motivation moderates the relationships between knowledge, attitude,  
20 commitment, and perceived behavioral control. The integrating model's explanatory  
21 power is 83.2%. Athletes' knowledge is crucial in shaping a positive attitude,  
22 commitment, and perceived control, enhancing their intention to get the COVID-19  
23 vaccine booster.

24

25 **Keywords:** COVID-19, stimulus-organization-response model, theory of planned  
26 behavior, vaccine booster, moderating effects

## 1 **1. Introduction**

2 The global sports community faced unprecedented challenges during the COVID-  
3 19 pandemic. Many sports competitions and training activities were halted due to anti-  
4 epidemic policies and regional lockdowns to prevent the virus's spread. This situation  
5 significantly impacted athletes' rights in Mainland China. Numerous important sporting  
6 events have been postponed or suspended, including high-profile ones like the Winter  
7 Olympics, the Chinese Basketball Association (CBA) Basketball League, and the  
8 Chinese Super League [1]. These disruptions severely affected the financial stability of  
9 sports organizations, the development of sports infrastructure, and, most importantly,  
10 athletes' mental and emotional well-being [2, 3]. Although COVID-19 vaccination has  
11 eased these difficulties, it is essential to note that vaccine efficacy is limited, and the  
12 virus's rapid mutations raise the risk of future outbreaks [4]. To ensure the health and  
13 safety of athletes and create a safe environment, receiving the COVID-19 vaccine  
14 booster is imperative. It is not only crucial for the sports industry but also for athletes'  
15 well-being.

16  
17 Upon the COVID-19 vaccine, most studies focus on the factors influencing the first-  
18 time vaccination. Only a few studies have made significant efforts to explore the factors  
19 influencing people's intention to receive COVID-19 vaccine booster. Understanding  
20 these factors is crucial for enhancing revaccinated acceptance, increasing revaccination  
21 rates, and reducing the risk of infection and severe illness [4-9]. For example, Kwok,  
22 Li (4) found that older age, smoking, experiencing no adverse effects from a previous  
23 COVID-19 vaccination, greater confidence in vaccines and collective responsibility,  
24 and fewer barriers in accessing vaccination services are associated with higher intention  
25 of receiving vaccine booster. Liu, Lu (5) study verified that expectation confirmation  
26 toward receiving the COVID-19 vaccine affects the vaccination intention of COVID-  
27 19 vaccine boosters. The studies indicate that factors influencing the acceptance of  
28 COVID-19 vaccine boosters vary among different populations, such as healthcare  
29 workers, adults, etc., and individuals of different nationalities, such as Iran, Australia,  
30 etc. Consequently, each study presents various strategies to enhance the acceptance of  
31 COVID-19 vaccine boosters. However, no empirical research addresses the athletes'  
32 acceptance of COVID-19 vaccine boosters.

33  
34 The Theory of Planned Behavior (TPB) has been widely utilized to interpret the  
35 intention of vaccination across various contexts [10]. It has been applied to understand  
36 the intention to vaccinate against H1N1 [11], HPV vaccination [12], whooping cough  
37 vaccination [13][15], MMR vaccination [14], and hepatitis A vaccination [15].  
38 However, while the TPB has proven to be a robust framework for explaining and  
39 predicting vaccination behavior [16], it has limitations in fully capturing behavioral  
40 intentions. As Catalano, Knowlden (17) have pointed out that TPB provides a valuable  
41 but partial explanation for the intention of vaccination. Therefore, there is a need to  
42 incorporate other models and variables into TPB to create a more comprehensive  
43 theoretical framework.

1 Stimulus-Organism-Response (SOR) is another well-known model widely used to  
2 identify the factors that trigger people's behaviors. It assumes that an individual's  
3 behavior is influenced by external stimuli affecting the mind, thereby eliciting specific  
4 actions [18]. Particularly, the SOR model has been applied to understand various  
5 behaviors in the COVID-19 context, such as purchasing behavior [19], information-  
6 avoidance behavior [20], seeking, passing, and providing COVID-19 information [21],  
7 travel intention [22], and COVID-19 vaccination [23]. While the SOR model offers a  
8 concise and robust theoretical foundation, combining it with the TPB theory can  
9 provide a more comprehensive understanding of individuals' behavior [24, 25]. For  
10 example, some studies have found that subject norm does not significantly affect  
11 behavioral intention, necessitating additional theories or variables to explain this  
12 phenomenon [26]. Therefore, integrating the TPB and SOR model to explore factors  
13 influencing athletes' intention to receive the COVID-19 vaccine booster, especially a  
14 lack of related studies, is essential to formulate effective strategies.

15  
16 Reviewing the literature on vaccination in previous studies, knowledge [27-29]  
17 and commitment [30, 31] are identified as vital factors that affect individuals' intention  
18 of vaccination. Knowledge is the most efficient power to stop the virus from spreading  
19 and protect oneself from being infected with COVID-19 [27]. On the other side,  
20 commitment ensures people can live in a healthy environment as COVID-19 continues  
21 to threaten our safety [31]. Thus, understanding the relationship between athletes'  
22 COVID-19 vaccine knowledge, commitment, and intention to receive the COVID-19  
23 vaccine booster helps formulate improved public health strategies. Moreover,  
24 motivation is a potential moderator to enhance the attitude toward vaccination [32].  
25 Previous studies mentioned that people with a higher level of motivation usually have  
26 a more positive attitude toward vaccination than those with a lower level of motivation  
27 [32]. Therefore, motivation can potentially enhance athletes' attitude toward the  
28 COVID-19 vaccine booster.

29  
30 Understanding athletes' intention to receive the COVID-19 vaccine booster is  
31 essential for a safe environment. Nonetheless, there needs to be more related studies. It  
32 is an urgent issue because there is hesitancy regarding COVID-19 vaccine boosters in  
33 China, especially among young individuals [33]. This situation may once again  
34 jeopardize athletes' opportunities for competition and training. Developing strategies to  
35 enhance athletes' intention to receive the COVID-19 vaccine booster is crucial in  
36 addressing the viral threat. Accordingly, the purpose of this study is to integrate the  
37 TPB and SOR model while incorporating two critical variables, knowledge and  
38 commitment, to examine their relationships to receiving the COVID-19 vaccine booster.  
39 This study also assesses the moderating effect of motivation in the model. The goal is  
40 to derive specific strategies from these findings for reference.

41

## 42 **2. Literature Review**

### 43 **2.1 Theory of Planned Behavior and Stimulus-Organism-Response Model**

44 The TPB is one of the popular frameworks for studying individual behaviors. It

1 aids researchers in identifying the precursors to environmental behaviors and devising  
2 interventions to address these elements [34]. According to TPB, behavior is driven by  
3 personal attitude, subjective norm, and perceived behavioral control, which posits that  
4 behavior and norms influence three intention determinants and control beliefs, often  
5 called indirect predictors [35]. Within this theory, personal attitudes are characterized  
6 by individuals' positive or negative evaluations of self-expression regarding a specific  
7 behavior [16]. Subjective norms and perceived behavioral control, on the other hand,  
8 pertain to an individual's perception of social pressure and the ease of performing the  
9 behavior, respectively [16]. More favorable attitudes and subjective norms are  
10 associated with greater perceived behavioral control and an individual's willingness to  
11 engage in the behavior [16].  
12

13 Nevertheless, TPB still has limitations in explaining individual behavior, such as  
14 the person-factor issue [36]. Hill, Figueredo (36) argued that TPB focuses on individual  
15 cognitive factors and does not fully consider the broader environmental or contextual  
16 influences on behavior. Due to the dynamic nature of human behaviors, individuals  
17 might change their perspectives based on external stimuli, or personal experiences are  
18 ignored [37]. Therefore, athletes' decisions regarding the COVID-19 vaccine booster  
19 might not be solely based on their attitudes or beliefs. External factors need to be  
20 considered [34].  
21

22 The SOR model offers a theoretical perspective on how external stimuli influence  
23 individual behaviors through learned responses [38]. Rooted in existing research, this  
24 model proposes that when an individual encounters an external stimulus, it activates  
25 their internal emotional state. The Stimulus (S) stands for external triggers that initiate  
26 changes in one's inner realm. The Organism (O) signifies the internal experiences tied  
27 to an individual's cognitive and emotional processing. Notably, cognitive processing  
28 involves thought patterns based on the assimilation of information, while emotional  
29 processing pertains to feelings and emotions [39]. Lastly, the Response (R)  
30 encapsulates the resulting behavior that emanates from the interaction between the  
31 external stimulus and the internal state. This behavior directly manifests how the  
32 internal states influence individual reactions [40].  
33

34 Integrating the TPB and SOR model can complement the limitations of explaining  
35 behavior within a single model. The SOR model provides a nuanced understanding of  
36 behavioral intention (intention to receive the COVID-19 vaccine booster) by  
37 emphasizing the emotional and affective responses (attitude, commitment, and  
38 perceived behavioral control) to external stimuli (knowledge and subjective norm),  
39 thereby addressing the gap in TPB's cognitive-centric approach. Furthermore, the SOR  
40 framework offers a dynamic interplay between the environment and an individual's  
41 internal processes, simplifying the operationalization and measurement of behavioral  
42 influences and embedding external environmental considerations. Accordingly,  
43 integrating the TPB and SOR offers a comprehensive framework combining cognitive  
44 and emotional determinants, enabling a more thorough understanding of athletes'

1 intention of the COVID-19 vaccine booster.

2

## 3 **2.2 Research Framework and Hypotheses**

### 4 **2.2.1 Stimulus: Subjective norm and Knowledge**

5 Subjective norm can be regarded as an external stimulus. It refers to the influence  
6 of critical social individuals or groups and the pressure to conform to societal  
7 expectations, which can shape an individual's behavioral intention [16, 41]. It reflects  
8 the individual's perception of how significant others (e.g., family, friends, peers, or  
9 society) would like them to behave. Several studies have confirmed that subjective  
10 norm significantly affects individuals' intention to receive the COVID-19 vaccine  
11 booster [42-44]. Since Athletes can internalize the beliefs of their social circles, it can  
12 further increase their willingness to get the COVID-19 vaccine booster.

13

14 Subjective norm affects behavioral intention and significantly affects individual  
15 emotional perceptions [45]. For example, an attitude towards a particular behavior is  
16 shaped by family, colleagues, friends, and experts, influencing buying behavior [46,  
17 47]. Moreover, subjective norm shapes commitment by leveraging individuals' innate  
18 desire for social acceptance and cohesion, with motivations ranging from seeking  
19 external validation and fearing social repercussions to desiring harmony and avoiding  
20 cognitive dissonance [48]. Especially when not receiving the COVID-19 vaccine  
21 booster could impact other athletes' training and competitions, it might lead to  
22 heightened commitment. Accordingly, this study aims to investigate whether subjective  
23 norm can influence athletes' attitude, commitment, and intention to receive the COVID-  
24 19 vaccine booster. The study proposes the following hypotheses:

25

26 H1: Subjective norm significantly influences athletes' attitude toward COVID-19  
27 vaccine booster.

28 H2: Subjective norm significantly influences athletes' commitment of COVID-19  
29 vaccine booster.

30 H3: Subjective norm significantly influences athletes' intention to receive the COVID-  
31 19 vaccine booster.

32

33

34 Knowledge is the key to determinant the intention to receive the COVID-19  
35 vaccine booster [49, 50]. Knowledge can equip individuals with accurate information,  
36 dispelling myths and fostering trust in the COVID-19 vaccine [49]. Sujarwoto and  
37 Maharani (50) mentioned that misinformation and less accurate knowledge are major  
38 contributors to COVID-19 vaccine hesitancy. Thus, accurate knowledge about the  
39 COVID-19 vaccines correlates with reduced hesitancy and increased acceptance. There  
40 are several studies proved that knowledge can positively enhance individuals' attitude  
41 [51], commitment [52], and perceived behavioral control [53]. Consequently, it is  
42 plausible to hypothesize that the extent of athletes' knowledge of the COVID-19  
43 vaccine booster could significantly influence their attitudes and behaviors. The  
44 hypotheses are postulated as follows:



1

2 H4: Knowledge significantly influences athletes' attitude toward COVID-19 vaccine  
3 booster.

4 H5: Knowledge significantly influences athletes' commitment of COVID-19 vaccine  
5 booster.

6 H6: Knowledge significantly influences athletes' perceived behavioral control of  
7 COVID-19 vaccine booster.

8 H7: Knowledge significantly influences athletes' intention to receive the COVID-19  
9 vaccine booster.

10

### 11 **2.2.2 Organism: Attitude, Commitment, and Perceived Behavioral Control**

12 In the context of TPB, attitude is defined as the positive or negative psychological  
13 evaluation of engaging in a specific behavior [16], which substantially affects  
14 individuals' behavioral intentions. It believes that people are more likely to engage in  
15 a behavior if they have a positive attitude, and vice versa [16]. Therefore, numerous  
16 studies have confirmed that attitude can enhance the intention to receive the COVID-  
17 19 vaccine booster [42, 53, 54]. For instance, Asmare, Abebe (53) found that attitude  
18 and subjective norm are statistically significant predictors of intention to receive the  
19 COVID-19 vaccine booster. Attitude is the strongest predictor in the model. Attitude  
20 shapes perception, and in the context of the COVID-19 vaccine booster, it is the pivotal  
21 force driving athletes' intention to vaccinate, anchoring decisions in belief and  
22 sentiment.

23

24 Attitude in the expended TPB model can be regarded as a mediator. Attitude is a  
25 psychological response influenced by external stimuli, leading to positive or negative  
26 perspectives, and then resulting in specific behaviors [55-57]. Tarkar (56) verified that  
27 attitude is a vital mediator in connecting perceived benefits, perceived susceptibility,  
28 and intention to receive the COVID-19 vaccination. Accordingly, attitude within  
29 expended TPB is a vital link between individuals' cognitive and emotional evaluations  
30 of their intentions to perform the behaviors. However, there is a lack of study on the  
31 COVID-19 vaccine booster issue from athletes' perspectives. This study tests attitude's  
32 role (direct and indirect effects) in the integrating model. The study proposes the  
33 following hypotheses:

34

35 H8: Athletes' attitude significantly influence their intention to receive the COVID-19  
36 vaccine booster.

37 H9a: Athletes' attitude is a mediator between subjective norm and intention to receive  
38 the COVID-19 vaccine booster.

39 H9a: Athletes' attitude is a mediator between knowledge and intention to receive the  
40 COVID-19 vaccine booster.

41

42 Commitment is widely acknowledged as an effective means of sustaining the  
43 value of entities or individuals in long-term relationships and generating desired  
44 behaviors [58]. Commitment is often associated with a strong emotional and

1 psychological attachment to a particular behavior or outcome. It can enhance the  
2 strength of an individual's intention toward a specific behavior [58, 59]. In vaccination  
3 studies, commitment is regarded as a causal factor that significantly drives actual  
4 vaccination behavior [59]. This assumption gains particular relevance in the context of  
5 COVID-19 vaccine booster, given the continuous mutation of the coronavirus and the  
6 limited duration of vaccine protection [60]. Therefore, this study considers commitment  
7 an extended variable and a mediator within the integrating framework, contributing to  
8 the comprehensive understanding of the relationship among athletes' subjective norm,  
9 knowledge, and intention to receive the COVID-19 vaccine booster. The study proposes  
10 the following hypotheses:

11

12 H10: Athletes' commitment significantly influences their intention to receive the  
13 COVID-19 vaccine booster.

14 H11a: Athletes' commitment is a mediator between subjective norm and intention to  
15 receive the COVID-19 vaccine booster.

16 H11a: Athletes' commitment is a mediator between knowledge and intention to receive  
17 the COVID-19 vaccine booster.

18

19 Perceived behavioral control is a crucial concept within the TPB as it pertains to  
20 an individual's perception of their ability to control and carry out a specific behavior  
21 [16]. It reflects individuals' assessment of the obstacles, challenges, and barriers they  
22 may encounter when executing the behavior. High perceived control can help overcome  
23 the barriers that make individuals believe they have significant control over the factors  
24 that facilitate the behavior [16]. This perception can significantly influence the  
25 likelihood of forming behavioral intentions and subsequently taking action [16].  
26 Several studies have verified a causal relationship between perceived behavioral control  
27 and vaccination intention [61, 62]. For example, Liu, Wang (62) research demonstrated  
28 a significant correlation between women's behavioral intentions regarding human  
29 papillomavirus vaccination and their perceived behavioral control. In the context of this  
30 study, perceived behavioral control refers to an athlete's confidence in their ability to  
31 accept and undergo the COVID-19 vaccine booster. This study examines the effect of  
32 perceived behavioral control on athletes' intentions to get vaccine booster against  
33 COVID-19. Therefore, the study proposes the following hypotheses:

34

35 H12: Athletes' perceived behavioral control significantly influences their intention to  
36 receive the COVID-19 vaccine booster.

37 H13a: Athletes' perceived behavioral control is a mediator between subjective norm  
38 and intention to receive the COVID-19 vaccine booster.

39 H13a: Athletes' perceived behavioral control is a mediator between knowledge and  
40 intention to receive the COVID-19 vaccine booster.

41

### 42 **2.2.3 Response: Intention to Receive the COVID-19 Vaccine Booster**

43 The intention to receive the COVID-19 vaccine booster has been a prevalent issue  
44 in recent years due to studies showing that antibodies would decline over time post-



1 vaccination (Shrotri et al., 2021). The vaccine booster is one of the effective ways to  
2 maintain individual and public health. Thus, many studies focus on the factors  
3 influencing the intention to receive the COVID-19 vaccine booster. Such as pandemic  
4 fatigue [63], preventive practices [63], attitude [42, 64], subjective norms [42, 43],  
5 perceived behavioral control [42, 43], risk perception [42], vaccine hesitancy [42, 64],  
6 trust [64], social network [65], knowledge [65], and perceived vulnerability [43].  
7 However, an integrating model is lacking to comprehend the intention to receive the  
8 COVID-19 vaccine booster, especially athletes. Due to athletes' frequent interactions  
9 with diverse groups during training and competitions, they are at higher risk of  
10 contracting COVID-19. Thus, the primary aim of this study is to combine the TPB and  
11 SOR models to understand the factors affecting athletes' intention to receive the  
12 COVID-19 vaccine booster.

13

#### 14 **2.2.4 Moderator: Motivation**

15 Motivation is crucial moderator in the integrating model, as it represents an  
16 individual's internal drive or state that facilitates human behavior [66]. High motivation  
17 can trigger positively and actively emotional reflection. Motivation can be considered  
18 as a mediator to enhance the process of external stimuli to internal emotional responses,  
19 increase the likelihood of behavioral outcomes [67, 68]. Moderating effect of  
20 motivation is widely applied in management studies to examine employee behaviors.  
21 However, in the context of vaccination, no studies have used motivation as a moderator  
22 to explore its effects on psychological responses. Accordingly, the study employs  
23 motivation as a moderator to test the enhancing effect between athletes' external stimuli  
24 to psychological reactions. The study proposes the following hypotheses:

25

- 26 H14a: Athletes' motivation is a moderator between subjective norm and attitude.  
27 H14b: Athletes' motivation is a moderator between subjective norm and comment.  
28 H14c: Athletes' motivation is a moderator between knowledge and perceived  
29 behavioral control.

30

31 Based on an extensive literature review, the research framework is visually  
32 depicted in Figure 1.

33

34 **Please insert Figure 1 here**

35

### 36 **3. Methods**

#### 37 **3.1 Research Design**

38 The primary purpose of this study was to use the TPB and SOR integrating model  
39 to identify the factors influencing athletes' intention to receive the COVID-19 vaccine  
40 booster in Mainland China. The present study was conducted with a quantitative  
41 approach. A questionnaire was developed based on relevant previous studies. The study  
42 respondents were recruited from the 2021 National Games of the People's Republic of  
43 China. Data collection was conducted through the administration of an online  
44 questionnaire. The collected data was analyzed by structural equation modeling (SEM).

### 3.2 Respondents

Purposive sampling was employed to select the athletes who are members of varsity sports teams and have experience in national games in Mainland China. The study excluded the athletes who have no experience in national games. Data collection was using a questionnaire survey, which took place during the 2021 National Games of the People's Republic of China, held in Shaanxi from September 15 to September 27. To ensure adequate data collection, the study sought the cooperation with coaches who assisted in distributing the questionnaires to various sports groups of athletes, including soccer, bodybuilding, taekwondo, swimming, basketball, volleyball, table tennis, badminton, track and field, gymnastics, and traditional martial arts. A total of one thousand and fifty questionnaires were distributed. Consequently, sixty-nine questionnaires were identified as invalid and were excluded due to consistent or repetitive responses and incompleteness. Finally, nine hundred and eighty-one valid questionnaires were gathered, and the valid response rate was 93.4%.

### 3.3 Measurement

The questionnaire consisted of two sections. The first section is the scale, and the second section is respondents' demographic information. In the first section, the items of the scale were developed following Ajzen (16) definitions of attitudes (5 items), subjective norm (4 items), perceived behavioral control (3 items), and intention to receive COVID-19 vaccine booster (3 items). Furthermore, the items of motivation (5 items) were developed based on Jang, Bai (66) definition of motivation. The commitment items (3 items) were built according to Lokhorst, Werner (58) opinions of commitment. Finally, The items of knowledge (4 items) were established by Jairoun, Al-Hemyari (49) definition (Table 1). This study used a Likert 7-point scale as the standard measurement.

The second section of the questionnaire was used to collect respondents' demographic information, including gender, grade level, major, sports expertise, place of residence, number of training days per week, training frequency per day, and duration of day training.

Table 1. The items of the scale

| Variables       | Items                                                    | References |
|-----------------|----------------------------------------------------------|------------|
| Attitude        | I think COVID-19 vaccine booster can:                    | [16]       |
|                 | 1. effective anti-epidemic virus (A1)                    |            |
|                 | 2. proceed my training smoothly (A2)                     |            |
|                 | 3. maintain my health (A3)                               |            |
| Subjective norm | 4. resume the competition (A4)                           | [16]       |
|                 | I will receive COVID-19 vaccine booster because (of):    |            |
|                 | 5. teammates are received (SN5)                          |            |
|                 | 6. coach are received (SN6)                              |            |
|                 | 7. other teams are received (SN7)                        |            |
|                 | 8. school/national epidemic prevention regulations (SN8) |            |

|                                               |                                                                                    |      |
|-----------------------------------------------|------------------------------------------------------------------------------------|------|
| Perceived behavioral control                  | I think receiving COVID-19 vaccine booster:                                        |      |
|                                               | 9. has little side-effect to me (PBC9)                                             |      |
|                                               | 10. is simple (PBC10)                                                              | [16] |
|                                               | 11. is convenient (PBC11)                                                          |      |
|                                               | 12. is smooth and fast (PBC12)                                                     |      |
| Motivation                                    | I receive COVID-19 vaccine booster because (of):                                   |      |
|                                               | 13. keep training (M13)                                                            |      |
|                                               | 14. available for competition (M14)                                                | [66] |
|                                               | 15. the safety to coaches and teammates (M15)                                      |      |
|                                               | 16. competition requirements (M16)                                                 |      |
|                                               | 17. requirements of the training venues (M17)                                      |      |
| Knowledge                                     | I understand the COVID-19 vaccine booster of:                                      |      |
|                                               | 18. mechanism (K18)                                                                |      |
|                                               | 19. ingredients (K19)                                                              | [49] |
|                                               | 20. inoculation method (K20)                                                       |      |
|                                               | 21. potential side-effects (K21)                                                   |      |
| Commitment                                    | I promise I will:                                                                  | [58] |
|                                               | 22. receive the COVID-19 vaccine booster as the first place against pandemic (C22) |      |
|                                               | 23. regularly receive the COVID-19 vaccine booster (C23)                           |      |
|                                               | 24. have faith in the COVID-19 vaccine booster (C24)                               |      |
| Intention to Receive COVID-19 Vaccine Booster | I will:                                                                            |      |
|                                               | 25. receive the COVID-19 vaccine booster (BIV25)                                   |      |
|                                               | 26. complete the COVID-19 vaccine booster (BIV26)                                  | [16] |
|                                               | 27. receive the vaccine booster to maintain health (BIV27)                         |      |

1

2

### 3.4 Ethical Statement

3

4

5

6

7

8

9

10

11

12

13

### 3.5 Data Analysis

14

15

16

17

18

Statistical analyses for this study were conducted using SPSS 22.0 software and Smart-PLS 3.0 software. Descriptive analysis was employed to analyze respondents' demographic information. Partial least squares structural equation modeling was used to analyze the reliability and validity, and verify the relationships in the integrating model.

1 **4. Results and Discussion**

2 **4.1 Demographic**

3 The respondents' demographic information reveals that female athletes (54.3%) are  
 4 slightly more than male athletes (45.7%). More than half of respondents' majors are  
 5 non-physical education (61.5%). Approximately 50.7% of the athletes specialize in  
 6 taekwondo. 24.8% of the athletes train once a week, and 57.6% spend 61 to 120 minutes  
 7 on daily training (Table 2).

8  
 9 Table 2. The respondents' demographic (n=981)

| Variables                | Frequency | Percentage (%) | Variables                       | Frequency | Percentage (%) |
|--------------------------|-----------|----------------|---------------------------------|-----------|----------------|
| <b>Gender</b>            |           |                | <b>Training days per week</b>   |           |                |
| Male                     | 448       | 45.7           | One day                         | 243       | 24.8           |
| Female                   | 533       | 54.3           | Two days                        | 102       | 10.4           |
| <b>Major</b>             |           |                | Three days                      |           |                |
| Physical education       | 378       | 38.5           | Four days                       | 97        | 9.9            |
| Non-physical education   | 603       | 61.5           | Five days                       | 173       | 17.6           |
| <b>Sports major</b>      |           |                | More than six days              |           |                |
| Soccer                   | 45        | 4.6            | <b>Duration of day training</b> |           |                |
| Aerobics                 | 41        | 4.2            | Under 60 minutes                | 187       | 19.1           |
| Taekwondo                | 496       | 50.7           | 61-120 minutes                  | 565       | 57.6           |
| Swim                     | 9         | 0.9            | 121-180 minutes                 | 174       | 17.7           |
| Basketball               | 85        | 8.7            | 181 minutes or more             | 55        | 5.6            |
| Volleyball               | 99        | 10.1           |                                 |           |                |
| Table tennis             | 20        | 2.0            |                                 |           |                |
| Badminton                | 47        | 4.8            |                                 |           |                |
| Track and field          | 26        | 2.7            |                                 |           |                |
| Gymnastics               | 10        | 1.0            |                                 |           |                |
| Traditional martial arts | 23        | 2.3            |                                 |           |                |
| Others                   | 78        | 8.0            |                                 |           |                |

10

11

12 **4.2 Reliability and Validity**

13 The reliability and validity of the present study achieve the standard requirements.  
 14 First, the observed variables' factor loadings (FL) exceed 0.700 (range from 0.757 to  
 15 0.960), representing a high correlation between the observed and latent variables and  
 16 great convergent validity. Second, the Cronbach's alpha coefficient of the latent  
 17 variables exceeds 0.900 (range from 0.901 to 0.949), which indicates strong internal  
 18 consistency reliability. Third, the latent variables' construction reliability (CR)  
 19 coefficients exceed 0.800 (range from 0.925 to 0.961), showing substantial correlations  
 20 between the observed variables. Fourth, the average extracted variance (AVE) of the  
 21 variables surpasses the standard values of 0.500 (range from 0.755 to 0.884), which  
 22 indicates that the observed variables can explain each latent variable over 50% of the  
 23 variance (Table 3). Finally, the square root of the AVE of each latent variable is higher

1 than the correlation coefficients between the variables, demonstrating that the potential  
 2 variables possess great discriminant validity. The integrating model achieves strong  
 3 reliability and validity (Table 4).

4

5 Table 3. Reliability and validity

| Variables                                     | Items | FL    | M     | Cronbach's $\alpha$ | CR    | AVE   |
|-----------------------------------------------|-------|-------|-------|---------------------|-------|-------|
| Attitude                                      | A1    | 0.942 | 6.606 | 0.946               | 0.961 | 0.862 |
|                                               | A2    | 0.952 |       |                     |       |       |
|                                               | A3    | 0.920 |       |                     |       |       |
|                                               | A4    | 0.898 |       |                     |       |       |
| Subject norm                                  | SN5   | 0.898 | 6.074 | 0.901               | 0.925 | 0.755 |
|                                               | SN6   | 0.908 |       |                     |       |       |
|                                               | SN7   | 0.904 |       |                     |       |       |
|                                               | SN8   | 0.757 |       |                     |       |       |
| Perceived behavioral control                  | PCB9  | 0.943 | 6.229 | 0.918               | 0.948 | 0.860 |
|                                               | PCB10 | 0.908 |       |                     |       |       |
|                                               | PCB11 | 0.929 |       |                     |       |       |
|                                               | PCB12 | 0.943 |       |                     |       |       |
| Motivation                                    | M13   | 0.896 | 6.480 | 0.949               | 0.961 | 0.831 |
|                                               | M14   | 0.918 |       |                     |       |       |
|                                               | M15   | 0.884 |       |                     |       |       |
|                                               | M16   | 0.936 |       |                     |       |       |
|                                               | M17   | 0.923 |       |                     |       |       |
| Knowledge                                     | K18   | 0.910 | 6.149 | 0.901               | 0.930 | 0.770 |
|                                               | K19   | 0.880 |       |                     |       |       |
|                                               | K20   | 0.887 |       |                     |       |       |
|                                               | K21   | 0.830 |       |                     |       |       |
| Commitment                                    | C24   | 0.929 | 6.552 | 0.913               | 0.945 | 0.852 |
|                                               | C25   | 0.946 |       |                     |       |       |
|                                               | C26   | 0.894 |       |                     |       |       |
| Intention to Receive COVID-19 Vaccine Booster | IB22  | 0.960 | 6.628 | 0.934               | 0.958 | 0.884 |
|                                               | IB23  | 0.905 |       |                     |       |       |
|                                               | IB27  | 0.954 |       |                     |       |       |

6 Note: FL=Factor loading; M=Mean; CR= Construction reliability; AVE= Average  
 7 extraction variance

8

9 Table 4. Discriminant analysis

|    | A            | C            | BI           | K            | M            | PBC | SN |
|----|--------------|--------------|--------------|--------------|--------------|-----|----|
| A  | <b>0.928</b> |              |              |              |              |     |    |
| C  | 0.857        | <b>0.923</b> |              |              |              |     |    |
| BI | 0.824        | 0.902        | <b>0.940</b> |              |              |     |    |
| K  | 0.684        | 0.698        | 0.638        | <b>0.877</b> |              |     |    |
| M  | 0.780        | 0.739        | 0.733        | 0.612        | <b>0.912</b> |     |    |

---

|     |       |       |       |       |       |              |              |
|-----|-------|-------|-------|-------|-------|--------------|--------------|
| PBC | 0.800 | 0.782 | 0.774 | 0.690 | 0.737 | <b>0.927</b> |              |
| SN  | 0.649 | 0.632 | 0.603 | 0.625 | 0.631 | 0.614        | <b>0.869</b> |

---

1 Note: A= Attitude; C= Commitment; BI= Behavioral control; K= Knowledge; M=Motivation;  
2 PBC= Perceived behavioral control; SN= Subject norm

3

#### 4 **4.3 Model Fit**

5 Goodness-of-fit (GoF) is the essential model evaluation index for PLS-SEM. Akter,  
6 D'ambra (69) suggest that if the GoF is higher than 0.360, it means that the model has  
7 a high level of model fit; between 0.250 to 0.350 is a medium level of model fit;  
8 between 0.10 to 0.240 is acceptable; below 0.100 means the model fit is unacceptable.  
9 The formula of GoF is as follows:

10

11

$$\text{GoF} = \sqrt{\text{average AVE} \times \text{average R}^2}$$

12

13 The GoF of this study is calculated to be 0.791, which means that the integrating  
14 model has a high level of model fit.

15

#### 16 **4.4 Structural Model Analysis**

17 The results of the structural model analysis (Figure 2) indicate that stimulus to  
18 organism and response, the athletes' subjective norm significantly influences attitude  
19 ( $\beta=0.342^*$ ,  $p<0.05$ ) and commitment ( $\beta=0.304^*$ ,  $p<0.05$ ) but does not significantly  
20 influence the intention to receive COVID-19 vaccine booster ( $\beta=0.008$ ,  $p>0.05$ ). On  
21 the other side, the athletes' knowledge of the COVID-19 vaccine booster has a  
22 significant effect on attitude ( $\beta=0.472^*$ ,  $p<0.05$ ), commitment ( $\beta=0.510^*$ ,  $p<0.05$ ), and  
23 perceived behavioral control ( $\beta=0.690^*$ ,  $p<0.05$ ). However, knowledge does not  
24 significantly influence the athletes' intention to receive the COVID-19 vaccine booster  
25 ( $\beta=0.049$ ,  $p>0.05$ ). Knowledge more substantially affects athletes' attitudes and  
26 commitment to receiving the COVID-19 vaccine booster compared to subjective norm.  
27 Moreover, knowledge can effectively enhance athletes' perceived behavioral control of  
28 getting the COVID-19 vaccine booster.

29

30 Of the organism to response, athletes' attitude ( $\beta=0.132^*$ ,  $p<0.05$ ), commitment  
31 ( $\beta=0.701^*$ ,  $p<0.05$ ), and perceived behavioral control ( $\beta=0.149^*$ ,  $p<0.05$ ) significantly  
32 influence the intention to receive COVID-19 vaccine booster. Commitment is the most  
33 vital organism factor in promoting athletes' intention to receive the COVID-19 vaccine  
34 booster. Furthermore, in the receiving COVID-19 vaccine booster context, attitude,  
35 commitment, and perceived behavioral control fully mediate the integrating model.  
36 Attitude has mediating effects between subjective norm ( $\beta=0.045^*$ ,  $p<0.05$ ),  
37 knowledge ( $\beta=0.062^*$ ,  $p<0.05$ ), and the intention to receive COVID-19 vaccine booster.  
38 Subjective norm ( $\beta=0.213^*$ ,  $p<0.05$ ) and knowledge ( $\beta=0.358^*$ ,  $p<0.05$ ) can indirectly  
39 influence the intention to receive the COVID-19 vaccine booster via commitment.  
40 Perceived behavioral control mediates knowledge ( $\beta=0.103^*$ ,  $p<0.05$ ) and the intention  
41 to receive the COVID-19 vaccine booster. Accordingly, knowledge to commitment is  
42 the most effective path to increase the athletes' intention to receive COVID-19 vaccine



1 booster.

2

3 Furthermore, the athletes' motivation can moderate the relationships between  
4 subjective norm and attitude ( $\beta=0.126^*$ ,  $p<0.05$ ), subjective norm and commitment  
5 ( $\beta=0.107^*$ ,  $p<0.05$ ), as well as knowledge and perceived behavioral control ( $\beta=0.066^*$ ,  
6  $p<0.05$ ). Subjective norm interaction with motivation can enhance athletes' attitude and  
7 commitment. Athletes' perceived behavioral control can be improved by knowledge-  
8 motivation interaction. The integrating model can explain 83% of athletes' intention to  
9 receive the COVID-19 vaccine booster.

10

11

**Please insert Figure 2 here**

12

## 13 **5. Discussion**

14

15

16

17

18

19

20

21

22

23

24

25

26

27

28

29

30

31

32

33

34

35

36

37

38

39

40

41

42

43

44

The present study combines the TPB and SOR to identify the factors influencing athletes' intention to receive the COVID-19 vaccine booster, as well as the moderating effects of motivation in the model. Overall, the integrating model provides insight into why athletes receive COVID-19 vaccine booster. Subjective norm and knowledge are the vital external stimuli that positively trigger athletes' attitude, commitment, and perceived behavioral control of getting the COVID-19 vaccine booster. Subjective norm can significantly influence individual emotional perceptions [45]. Such as Kim, Ham (46) and Shin and Hancer (47) they were pointed out that the crucial social group can positively or negatively shape individuals' attitude towards a particular behavior. Commitment is produced because of individuals' innate desire for social acceptance and cohesion to seek external validation and fear social repercussions [48]. Thus, to correspond to expectations within social circles, subjective norms from coaches and teammates are crucial to prompting athletes to receive the COVID-19 vaccine booster.

However, the study found that subjective norm and knowledge do not directly affect athletes' intention to receive the COVID-19 vaccine booster. This finding differs from most related studies [42-44, 50]. Athletes often prioritize personal experiences and beliefs over societal and peer pressure because of their high self-awareness [70]. Thus, significant others only influence athletes' internal emotions but do not directly affect their decision-making about receiving the COVID-19 vaccine booster. In addition, the concept of the SOR model refers to the response as the result of internal reflection triggered by external factors [38]. Thus, knowledge does not directly influence athletes' intention to receive the COVID-19 vaccine booster. Instead, it must be internalized into positive attitudes, commitment, and perceived behavioral control, leading to behavioral intention.

Athletes' attitude, commitment, and perceived behavioral control can increase their intention to receive the COVID-19 vaccine booster. The results echo related studies with similar findings [42, 53, 54, 59, 61]. Undoubtedly, positive attitude, strong commitment, and high perceived behavioral control are helpful to encourage athletes to overcome the barriers and engage in the intention to get the COVID-19 vaccine

1 booster [16, 58, 59]. Commitment is the strongest predictor in the integrating model  
2 because its emotional and psychological attachment solidly connects with the specific  
3 behavioral intention [58, 59]. When athletes believe the COVID-19 vaccine booster is  
4 an effective way to maintain their health and continue their training, the belief will  
5 transfer into the commitment that improves their intention to receive the COVID-19  
6 vaccine booster.

7  
8 Furthermore, attitude, commitment, and perceived behavioral control can  
9 indirectly increase athletes' intention to receive the COVID-19 vaccine booster. These  
10 organism factors play the full mediators in the model. These findings are similar to the  
11 previous studies [55-57, 71, 72]. In the present study, subjective norms and knowledge  
12 are treated as stimuli that arouse athletes' internal reflections, including attitude,  
13 commitment, and perceived behavioral control, and further produce their behavioral  
14 intention. The SOR model argues that the organism is a crucial process in triggering  
15 the response because it is an inevitable mechanism [39]. Particularly, athletes'  
16 commitment is the most significant mediator influencing the intention to receive the  
17 COVID-19 vaccine booster in the model. Commitment reflects individuals' strong  
18 internal conviction and dedication that forces to act subsequent behaviors [73]. When  
19 athletes believe in the benefits of the COVID-19 vaccine booster, they are genuinely  
20 committed to receiving the vaccine. Knowledge is regarded a catalyst to foster athletes'  
21 commitment. Li et al. (2021) argued that a lack of vaccine knowledge is the primary  
22 reason for vaccine hesitancy, and increasing this knowledge can bolster vaccine trust  
23 and commitment. Accordingly, enhancing athletes' vaccine knowledge is the priority  
24 strategy to improve their intention.

25  
26 Motivation can boost the relationship between stimulus and organism, including  
27 subjective norm and attitude, subjective norm and commitment, as well as knowledge  
28 and perceived behavioral control. Individuals with strong intrinsic motivation are more  
29 likely to interact with external stimuli, thereby increasing their willingness to perform  
30 specific behaviors [67, 68]. Thus, motivation amplifies the effect of athletes' stimulus  
31 (subjective norm and knowledge) to the organism (attitude, commitment, and perceived  
32 behavioral control) in the model. Therefore, boosting athletes' motivation for the  
33 COVID-19 vaccine booster is key to enhancing their attitude, commitment, and  
34 perceived behavioral control towards vaccination. Getting the COVID-19 vaccine  
35 booster should not just be mandatory; appropriate incentives are also essential.

## 36 37 **6. Contributions and Implications**

38 The present study provides several theoretical contributions and practical  
39 implications for improving athletes' intention to receive the COVID-19 vaccine booster.  
40 The contributions and implications are interpreted as follows:

### 41 42 **6.1 Theoretical Contributions:**

43 There are two significant theoretical contributions in the study. First, the study  
44 combines TPB and SOR model to understand athletes' pattern of receiving the COVID-

1 19 vaccine booster. The integrating model provides a comprehensive picture of the  
2 factors and paths influencing athletes' intentions. The findings address the lack of an  
3 integrated model examining athletes' intention to receive the COVID-19 vaccine  
4 booster. The study proves that the relationships between variables align with the SOR  
5 model. Also, the subjective norm is confirmed as an external factor, and attitude and  
6 perceived behavioral control are verified as internal reflections. The study suggests that  
7 the model can be used to explore the vaccinated behavior in different issues and  
8 populations in future study.

9  
10 In addition, this study reveals that motivation is a moderating variable prompting  
11 athletes towards a positive psychological reflection toward the COVID-19 vaccine  
12 booster. Motivation is treated as an independent variable in public health issues to  
13 explore its effect on behavioral intention or psychological status. Usually, motivation  
14 is considered a moderator to understand its reinforcement on individual psychological  
15 responses in human resource management and business administration fields. However,  
16 this study confirms that motivation is an essential moderator in public health issues,  
17 which can positively influence attitudes, commitment, and subjective norms toward  
18 vaccines. Future studies on public health can consider motivation as a moderator to  
19 explore relevant issues.

## 20 21 **6.2 Practical Implications**

22 Here are two practical implications for promoting vaccine acceptance. First,  
23 eliminating and preventing the spread of inaccurate vaccine information is paramount.  
24 The correct knowledge is the first and most crucial step to increase athletes' intention  
25 to receive COVID-19 vaccine booster. Salzburg Statement on Vaccination Acceptance  
26 suggests that (1) distinguishing levels of evidence in social media organizations and  
27 major search engines, (2) providing support from governments, policymakers,  
28 advocacy groups, educators, and philanthropists, as well as (3) educating by healthcare  
29 professionals and educators can improve individuals' correct knowledge of the vaccine  
30 [74]. Therefore, Internet information and health education, and support from relevant  
31 stakeholders for athletes are crucial. Athletes should learn knowledge about public  
32 health from professionals during their off-training periods.

33  
34 Second, incentives are necessary to increase the athletes' motivation to get the  
35 COVID-19 vaccine booster, which can effectively enhance their positive attitude and  
36 trust towards the vaccine booster. For example, in the US, vaccination incentives  
37 include free beers, \$100 savings bonds, scholarships, etc. Concurrently, delivering  
38 accurate vaccine information to the people establishes their long-term commitment and  
39 improves their received intention. Hence, the specific incentives combined with  
40 knowledge should be designed for athletes, such as offering free training equipment to  
41 those who receive the vaccine education and the COVID-19 vaccine booster. It can  
42 boost athletes' vaccination intentions and substantially enhance their attitudes and  
43 commitment.

## 1 7. Limitations of the Study

2 This study was conducted rigorously to comprehend athletes' intention to receive  
3 the COVID-19 vaccine booster. Nevertheless, there are several study limitations.  
4 Firstly, the respondents in the study were amateur athletes in Mainland China. The  
5 study results cannot be generalized to other populations. The future study could  
6 consider other populations, i.e., professional athletes, to compare the differences in the  
7 intention to get the COVID-19 vaccine booster. Additionally, this study was conducted  
8 in Mainland China. Thus, the findings are only applicable to Chinese athletes. Due to  
9 cultural differences, the results cannot be generalized to athletes from other countries.  
10 Future research can include athletes from other countries to test if similar results are  
11 observed. Third, this study utilized a quantitative approach to verify the relationships  
12 in the model. However, the reasons behind forming relationships are ambiguous.  
13 Therefore, future research can consider incorporating qualitative methods to provide  
14 detailed information explaining the athletes' intention to receive the COVID-19 vaccine  
15 booster.

## 16 8. Conclusions

17 This study proved that integrating TPB and SOR model can effectively explain  
18 athletes' intention to receive the COVID-19 vaccine booster. Subjective norm and  
19 knowledge significantly affect attitude, commitment, and perceived behavioral control.  
20 Attitude, commitment, and perceived behavioral control influence athletes' intention to  
21 receive the COVID-19 vaccine booster and serve as full mediators in the model. The  
22 path from knowledge to commitment greatly affects athletes' intention. Moreover,  
23 motivation significantly moderates the model's relationship between stimulus and  
24 organism. High motivation can amplify athletes' internal responses when interacting  
25 with external factors.  
26

## 27 28 References

- 29 1. China Central Television. Global sports events is affected by the epidemic make  
30 these games postponed or cancelled 2020 [cited 2023 4 October]. Available from:  
31 <http://sports.cctv.com/2020/03/05/ARTIhbOKdSqn6osvSIIIYBpW200305.shtml>.
- 32 2. Nauright J, Zipp S, Kim YH. The sports world in the era of COVID-19. Taylor &  
33 Francis; 2020. p. 1703-6.
- 34 3. Schinke R, Papaioannou A, Henriksen K, Si G, Zhang L, Haberl P. Sport  
35 psychology services to high performance athletes during COVID-19. Taylor & Francis;  
36 2020. p. 269-72.
- 37 4. Kwok KO, Li KK, Leung CLK, Tang A, Chan EYY, Tsoi MTF, et al. The way  
38 forward to achieve high COVID-19 vaccination and revaccination coverage in a city  
39 amid a period of tranquility. *Frontiers in public health*. 2022;10:935243.
- 40 5. Liu J, Lu S, Lu C, editors. What Motivates People to Receive Continuous COVID-  
41 19 Vaccine Booster Shots? An Expectation Confirmation Theory Perspective.  
42 *Healthcare*; 2022: MDPI.
- 43 6. Al-Taie A, Yilmaz Z. Exploring the intention and hesitancy to receive a booster  
44 dose of COVID-19 vaccine among patients with comorbid disease conditions using a

- 1 health belief model. *Vacunas*. 2023; Advance online publication. doi:  
2 <https://doi.org/10.1016/j.vacun.2023.06.006>.
- 3 7. Askarian M, Kazerooni AR, Karimzadeh P, Movahedi M, Hatam N. Investigating  
4 the tendency to use COVID-19 vaccine booster dose in Iran. *BMC Health Serv Res*.  
5 2023;23(1):1-7.
- 6 8. Al-taie A, Yilmaz Z. Assessment of intention and hesitancy to receive a booster  
7 dose of COVID-19 vaccine among community pharmacists using a vaccine hesitancy  
8 scale. *Journal of Public Health*. 2023:1-8.
- 9 9. Maria S, Pelupessy DC, Koesnoe S, Yuniastuti E, Handayani DOT, Siddiq TH,  
10 et al. COVID-19 booster vaccine intention by health care workers in Jakarta, Indonesia:  
11 Using the extended model of health behavior theories. *Tropical Medicine and Infectious  
12 Disease*. 2022;7(10):323.
- 13 10. Xiao X, Wong RM. Vaccine hesitancy and perceived behavioral control: A meta-  
14 analysis. *Vaccine*. 2020;38(33):5131-8.
- 15 11. Agarwal V. A/H1N1 vaccine intentions in college students: an application of the  
16 theory of planned behavior. *J Am Coll Health*. 2014;62(6):416-24.
- 17 12. Juraskova I, O'Brien M, Mullan B, Bari R, Laidsaar-Powell R, McCaffery K. HPV  
18 vaccination and the effect of information framing on intentions and behaviour: An  
19 application of the theory of planned behaviour and moral norm. *Int J Behav Med*.  
20 2012;19:518-25.
- 21 13. Ryan M, Marlow LA, Forster A. Countering vaccine hesitancy among pregnant  
22 women in England: the case of Boostrix-IPV. *International Journal of Environmental  
23 Research and Public Health*. 2020;17(14):4984.
- 24 14. Abhyankar P, O'connor DB, Lawton R. The role of message framing in promoting  
25 MMR vaccination: Evidence of a loss-frame advantage. *Psychology, Health and  
26 Medicine*. 2008;13(1):1-16.
- 27 15. Cha K-S, Kim KM. The factors related to mothers' intention to vaccinate against  
28 hepatitis A: applying the theory of planned behavior. *Child Health Nursing Research*.  
29 2019;25(1):1.
- 30 16. Ajzen I. The theory of planned behavior: Frequently asked questions. *Human  
31 Behavior and Emerging Technologies*. 2020;2(4):314-24.
- 32 17. Catalano HP, Knowlden AP, Birch DA, Leeper JD, Paschal AM, Usdan SL. Using  
33 the theory of planned behavior to predict HPV vaccination intentions of college men. *J  
34 Am Coll Health*. 2017;65(3):197-207.
- 35 18. Pandita S, Mishra HG, Chib S. Psychological impact of covid-19 crises on students  
36 through the lens of Stimulus-Organism-Response (SOR) model. *Children and Youth  
37 Services Review*. 2021;120:105783.
- 38 19. Laato S, Islam AN, Farooq A, Dhir A. Unusual purchasing behavior during the  
39 early stages of the COVID-19 pandemic: The stimulus-organism-response approach.  
40 *Journal of Retailing and Consumer Services*. 2020;57:102224.
- 41 20. Song S, Yao X, Wen N. What motivates Chinese consumers to avoid information  
42 about the COVID-19 pandemic?: The perspective of the stimulus-organism-response  
43 model. *Inf Process Manag*. 2021;58(1):102407.



- 1 21. Mladenović D, Todua N, Pavlović-Höck N. Understanding individual  
2 psychological and behavioral responses during COVID-19: Application of stimulus-  
3 organism-response model. *Telematics and Informatics*. 2023;79:101966.
- 4 22. Wang X-B, Chen C-C, Ku GCM, Chen C-H, Hsu CH, Lee P-Y. Travel for survive!  
5 Identifying the antecedents of vaccine tourists' travel intention: Using a stimulus-  
6 organism-response model. *Frontiers in public health*. 2022;10:850154.
- 7 23. Sitar-Taut D-A, Mican D. Social media exposure assessment: influence on  
8 attitudes toward generic vaccination during the COVID-19 pandemic. *Online*  
9 *Information Review*. 2023;47(1):138-61.
- 10 24. Tan CC. Intercepting stimulus-organism-response model, theory of planned  
11 behavior and theory of expectancy confirmation in the study of smartphone consumer  
12 behavior: A Thai university student perspective. *Asia Pacific Journal of Religions and*  
13 *Cultures*. 2019;3(2):27-48.
- 14 25. Sihombing SO. Integration of theory of planned behavior and health belief model  
15 for predicting the intention of COVID-19 vaccination: Empirical study in Indonesia.  
16 *Kasetsart Journal of Social Sciences*. 2023;44(2):407–18–18.
- 17 26. Manning M. The effects of subjective norms on behaviour in the theory of planned  
18 behaviour: A meta-analysis. *Br J Soc Psychol*. 2009;48(4):649-705.
- 19 27. Abebe H, Shitu S, Mose A. Understanding of COVID-19 vaccine knowledge,  
20 attitude, acceptance, and determinates of COVID-19 vaccine acceptance among adult  
21 population in Ethiopia. *Infection and drug resistance*. 2021:2015-25.
- 22 28. Bhartiya S, Kumar N, Singh T, Murugan S, Rajavel S, Wadhvani M. Knowledge,  
23 attitude and practice towards COVID-19 vaccination acceptance in West India. *Int J*  
24 *Community Med Public Health*. 2021;8(3):1170-6.
- 25 29. Chilongola JO, Rwegoshola K, Balingumu O, Semvua H, Kwigizile E. COVID-19  
26 knowledge, attitudes, practices and vaccination hesitancy in Moshi, Kilimanjaro region,  
27 northern Tanzania. *Tanzania Journal of Health Research*. 2022;23(1):1-12.
- 28 30. Kabbani S, Karkouljian S, Balozian P, Rizk S. The impact of ethical leadership,  
29 commitment and healthy/safe workplace practices toward employee attitude to  
30 COVID-19 vaccination/implantation in the banking sector in Lebanon. *Vaccines*.  
31 2022;10(3):416.
- 32 31. Hamburg M, Poland GA. The time is now for committed and comprehensive action  
33 to attain more broadly protective coronavirus vaccines: The coronavirus vaccines R&D  
34 roadmap. *Vaccine*. 2023;41(16):2645–7.
- 35 32. Moon K, Riege A, Gourdon-Kanhukamwe A, Vallée-Tourangeau G. The  
36 moderating effect of autonomy on promotional health messages encouraging healthcare  
37 professionals' to get the influenza vaccine. *J Exp Psychol Appl*. 2021;27(2):187.
- 38 33. Wang R, Qin C, Du M, Liu Q, Tao L, Liu J. The association between social media  
39 use and hesitancy toward COVID-19 vaccine booster shots in China: A web-based  
40 cross-sectional survey. *Hum Vaccin Immunother*. 2022;18(5):2065167.
- 41 34. Liu Y, Cai L, Ma F, Wang X. Revenge buying after the lockdown: Based on the  
42 SOR framework and TPB model. *Journal of Retailing and Consumer Services*.  
43 2023;72:103263.



- 1 35. Ulker-Demirel E, Ciftci G. A systematic literature review of the theory of planned  
2 behavior in tourism, leisure and hospitality management research. *Journal of*  
3 *Hospitality and Tourism Management*. 2020;43:209-19.
- 4 36. Hill D, Figueredo AJ, Jacobs WJ. Contextual influences on sustainable behavior.  
5 *Psychological Approaches to Sustainability: Current Trends in Theory, Research and*  
6 *Applications*. 2010:267-8.
- 7 37. Sniehotta FF, Presseau J, Araújo-Soares V. Time to retire the theory of planned  
8 behaviour. *Health Psychol Rev*. 2014;8(1):1-7.
- 9 38. Mehrabian A, Russell JA. An approach to environmental psychology. Cambridge,  
10 MA: the MIT Press; 1974.
- 11 39. Leung XY, Torres B, Fan A. Do kiosks outperform cashiers? An SOR framework  
12 of restaurant ordering experiences. *Journal of Hospitality and Tourism Technology*.  
13 2021;12(3):580-92.
- 14 40. Kucukergin KG, Kucukergin FN, Dedeoglu BB. An overview of the destination  
15 physical servicescape with SOR paradigm: The importance of prestige sensitivity. *Asia*  
16 *Pacific Journal of Tourism Research*. 2020;25(5):473-88.
- 17 41. Venkatesh V, Davis FD. A theoretical extension of the technology acceptance  
18 model: Four longitudinal field studies. *Management science*. 2000;46(2):186-204.
- 19 42. Hagger MS, Hamilton K. Predicting COVID-19 booster vaccine intentions.  
20 *Applied Psychology: Health and Well-Being*. 2022;14(3):819-41.
- 21 43. Wang J, Li T, Ge J, Zhou M, Walker AN, Chen J, et al. Applying two behavioral  
22 theories to predict the willingness to receive COVID-19 vaccine booster in the elderly:  
23 A cross-sectional study. *Research in Social and Administrative Pharmacy*.  
24 2023;19(3):495-501.
- 25 44. Barattucci M, Pagliaro S, Ballone C, Teresi M, Consoli C, Garofalo A, et al. Trust  
26 in science as a possible mediator between different antecedents and COVID-19 booster  
27 vaccination intention: an integration of health belief model (HBM) and theory of  
28 planned behavior (TPB). *Vaccines*. 2022;10(7):1099.
- 29 45. Nguyen GN, Ho TTH. Interplay between subjective norm, emotions, and purchase  
30 intention towards foreign brands: evidence from Vietnam. *Innovative Marketing*.  
31 2022;18(1):79-93.
- 32 46. Kim E, Ham S, Yang IS, Choi JG. The roles of attitude, subjective norm, and  
33 perceived behavioral control in the formation of consumers' behavioral intentions to  
34 read menu labels in the restaurant industry. *International Journal of Hospitality*  
35 *Management*. 2013;35:203-13.
- 36 47. Shin YH, Hancer M. The role of attitude, subjective norm, perceived behavioral  
37 control, and moral norm in the intention to purchase local food products. *Journal of*  
38 *Foodservice Business Research*. 2016;19(4):338-51.
- 39 48. Davis JL, Le B, Coy AE, Rickert J, Regan B, Ridgeway K. Commitment to the  
40 environment: The role of subjective norms in college and community samples. *J Appl*  
41 *Soc Psychol*. 2015;45(10):568-83.
- 42 49. Jairoun AA, Al-Hemyari SS, El-Dahiyat F, Jairoun M, Shahwan M, Al Ani M, et  
43 al. Assessing public knowledge, attitudes and determinants of third COVID-19 vaccine

- 1 booster dose acceptance: Current scenario and future perspectives. *Journal of*
- 2 *Pharmaceutical Policy and Practice*. 2022;15(1):1-13.
- 3 50. Sujarwoto S, Maharani A. Is knowledge about COVID-19 associated with
- 4 willingness to receive vaccine, vaccine uptake, and vaccine booster uptake in rural
- 5 Malang, Indonesia? *Frontiers in Public Health*. 2023;11:1203550.
- 6 51. Puspitasari IM, Yusuf L, Sinuraya RK, Abdulah R, Koyama H. Knowledge,
- 7 attitude, and practice during the COVID-19 pandemic: a review. *Journal of*
- 8 *Multidisciplinary Healthcare*. 2020:727-33.
- 9 52. Olaimat AN, Taha S, Osaili TM, Aolymat I, Alzyoud JA, Al-Holy MA, et al. The
- 10 Role of Communication and Commitment in COVID-19 Knowledge, Attitudes, and
- 11 Behaviors Among University Students in Jordan. *J Allied Health*. 2023;52(2):149-59.
- 12 53. Asmare G, Abebe K, Atnafu N, Asnake G, Yeshambel A, Alem E, et al. Behavioral
- 13 intention and its predictors toward COVID-19 vaccination among people most at risk
- 14 of exposure in Ethiopia: applying the theory of planned behavior model. *Hum Vaccin*
- 15 *Immunother*. 2021;17(12):4838-45.
- 16 54. Zhang K, Fang Y, Chan PS-f, Cao H, Chen H, Hu T, et al. Behavioral intention to
- 17 get a booster dose of COVID-19 vaccine among Chinese factory workers. *International*
- 18 *Journal of Environmental Research and Public Health*. 2022;19(9):5245.
- 19 55. Caso D, Capasso M, Fabbriatore R, Conner M. Understanding the psychosocial
- 20 determinants of Italian parents' intentions not to vaccinate their children: an extended
- 21 theory of planned behaviour model. *Psychol Health*. 2022;37(9):1111-31.
- 22 56. Tarkar P. Predicting intentions to get the COVID-19 vaccine in India: An
- 23 integration of theory of planned behaviour and health belief model. *The International*
- 24 *Journal of Health Planning and Management*. 2023;38(1):214-38. doi:
- 25 <https://doi.org/10.1002/hpm.3582>.
- 26 57. Limna P, Siripipatthanakul S, Phayaprom B, Siripipattanakul S. Factors Affecting
- 27 Intention to Get COVID-19 Vaccination Among Thai People. *International Journal of*
- 28 *Behavioral Analytics*. 2022;2(1):1-16.
- 29 58. Lokhorst AM, Werner C, Staats H, van Dijk E, Gale JL. Commitment and behavior
- 30 change: A meta-analysis and critical review of commitment-making strategies in
- 31 environmental research. *Environ Behav*. 2013;45(1):3-34.
- 32 59. Baloch MN, Siddiqui NZ, Bano A, Siddiqui S, Kiran T, Khan MK, et al. A cross
- 33 sectional survey: Attitude towards adult vaccination in Karachi-Pakistan. *International*
- 34 *Journal of Advanced Research*. 2015;3(3):512-52.
- 35 60. Marc L, Natalie E. Understanding COVID-19 vaccine efficacy. *Science*.
- 36 2020;370:763-5.
- 37 61. Gopi M, Ramayah T. Applicability of theory of planned behavior in predicting
- 38 intention to trade online: Some evidence from a developing country. *International*
- 39 *Journal of Emerging Markets*. 2007;2(4):348-60.
- 40 62. Liu X, Wang Q, Wei H-H, Chi H-L, Ma Y, Jian IY. Psychological and
- 41 demographic factors affecting household energy-saving intentions: a TPB-based study
- 42 in Northwest China. *Sustainability*. 2020;12(3):836.

- 1 63. Wong LP, Alias H, Siaw Y-L, Muslimin M, Lai LL, Lin Y, et al. Intention to  
2 receive a COVID-19 vaccine booster dose and associated factors in Malaysia. *Hum*  
3 *Vaccin Immunother.* 2022;18(5):2078634.
- 4 64. Yadete T, Batra K, Netski DM, Antonio S, Patros MJ, Bester JC. Assessing  
5 acceptability of COVID-19 vaccine booster dose among adult Americans: a cross-  
6 sectional study. *Vaccines.* 2021;9(12):1424.
- 7 65. Hu T, Li L, Lin C, Yang Z, Chow C, Lu Z, et al. An analysis of the willingness to  
8 the COVID-19 vaccine booster shots among urban employees: evidence from a  
9 megacity H in Eastern China. *International Journal of Environmental Research and*  
10 *Public Health.* 2022;19(4):2300.
- 11 66. Jang S, Bai B, Hu C, Wu C-ME. Affect, travel motivation, and travel intention: A  
12 senior market. *Journal of Hospitality & Tourism Research.* 2009;33(1):51-73.
- 13 67. Shafi M, Lei Z, Song X, Sarker MNI. The effects of transformational leadership on  
14 employee creativity: Moderating role of intrinsic motivation. *Asia Pacific Management*  
15 *Review.* 2020;25(3):166-76.
- 16 68. Jufrizen J, Mukmin M, Nurmala D, Jasin H. Effect of moderation of work  
17 motivation on the influence of organizational culture on organizational commitment  
18 and employee performance. *International Journal of Business Economics (IJBE).*  
19 2021;2(2):86-98.
- 20 69. Akter S, D'ambra J, Ray P. An evaluation of PLS based complex models: the roles  
21 of power analysis, predictive relevance and GoF index. 2011.
- 22 70. Zamanian F, Haghighi M, Forouzandeh E, Sedighi Z, Salehian MH. A comparison  
23 of emotional intelligence in elite student athletes and non-athletes. *Ann Biol Res.*  
24 2011;2(6):179-83.
- 25 71. Uddin MA, Mahmood M, Fan L. Why individual employee engagement matters  
26 for team performance? Mediating effects of employee commitment and organizational  
27 citizenship behaviour. *Team Performance Management: An International Journal.*  
28 2019;25(1/2):47-68.
- 29 72. Aga MK. The mediating role of perceived behavioral control in the relationship  
30 between entrepreneurship education and entrepreneurial intentions of university  
31 students in Ethiopia. *Journal of Innovation and Entrepreneurship.* 2023;12(1):32.
- 32 73. Lincoln JR, Kalleberg AL. Culture, control and commitment: A study of work  
33 organization and work attitudes in the United States and Japan. Cambridge, England:  
34 Cambridge University Press; 1992.
- 35 74. National Foundation for Infectious Diseases. Key Actions To Promote Vaccine  
36 Acceptance 2019 [cited 2023 10 October]. Available from: [https://www.nfid.org/key-](https://www.nfid.org/key-actions-to-promote-vaccine-acceptance/)  
37 [actions-to-promote-vaccine-acceptance/](https://www.nfid.org/key-actions-to-promote-vaccine-acceptance/).
- 38

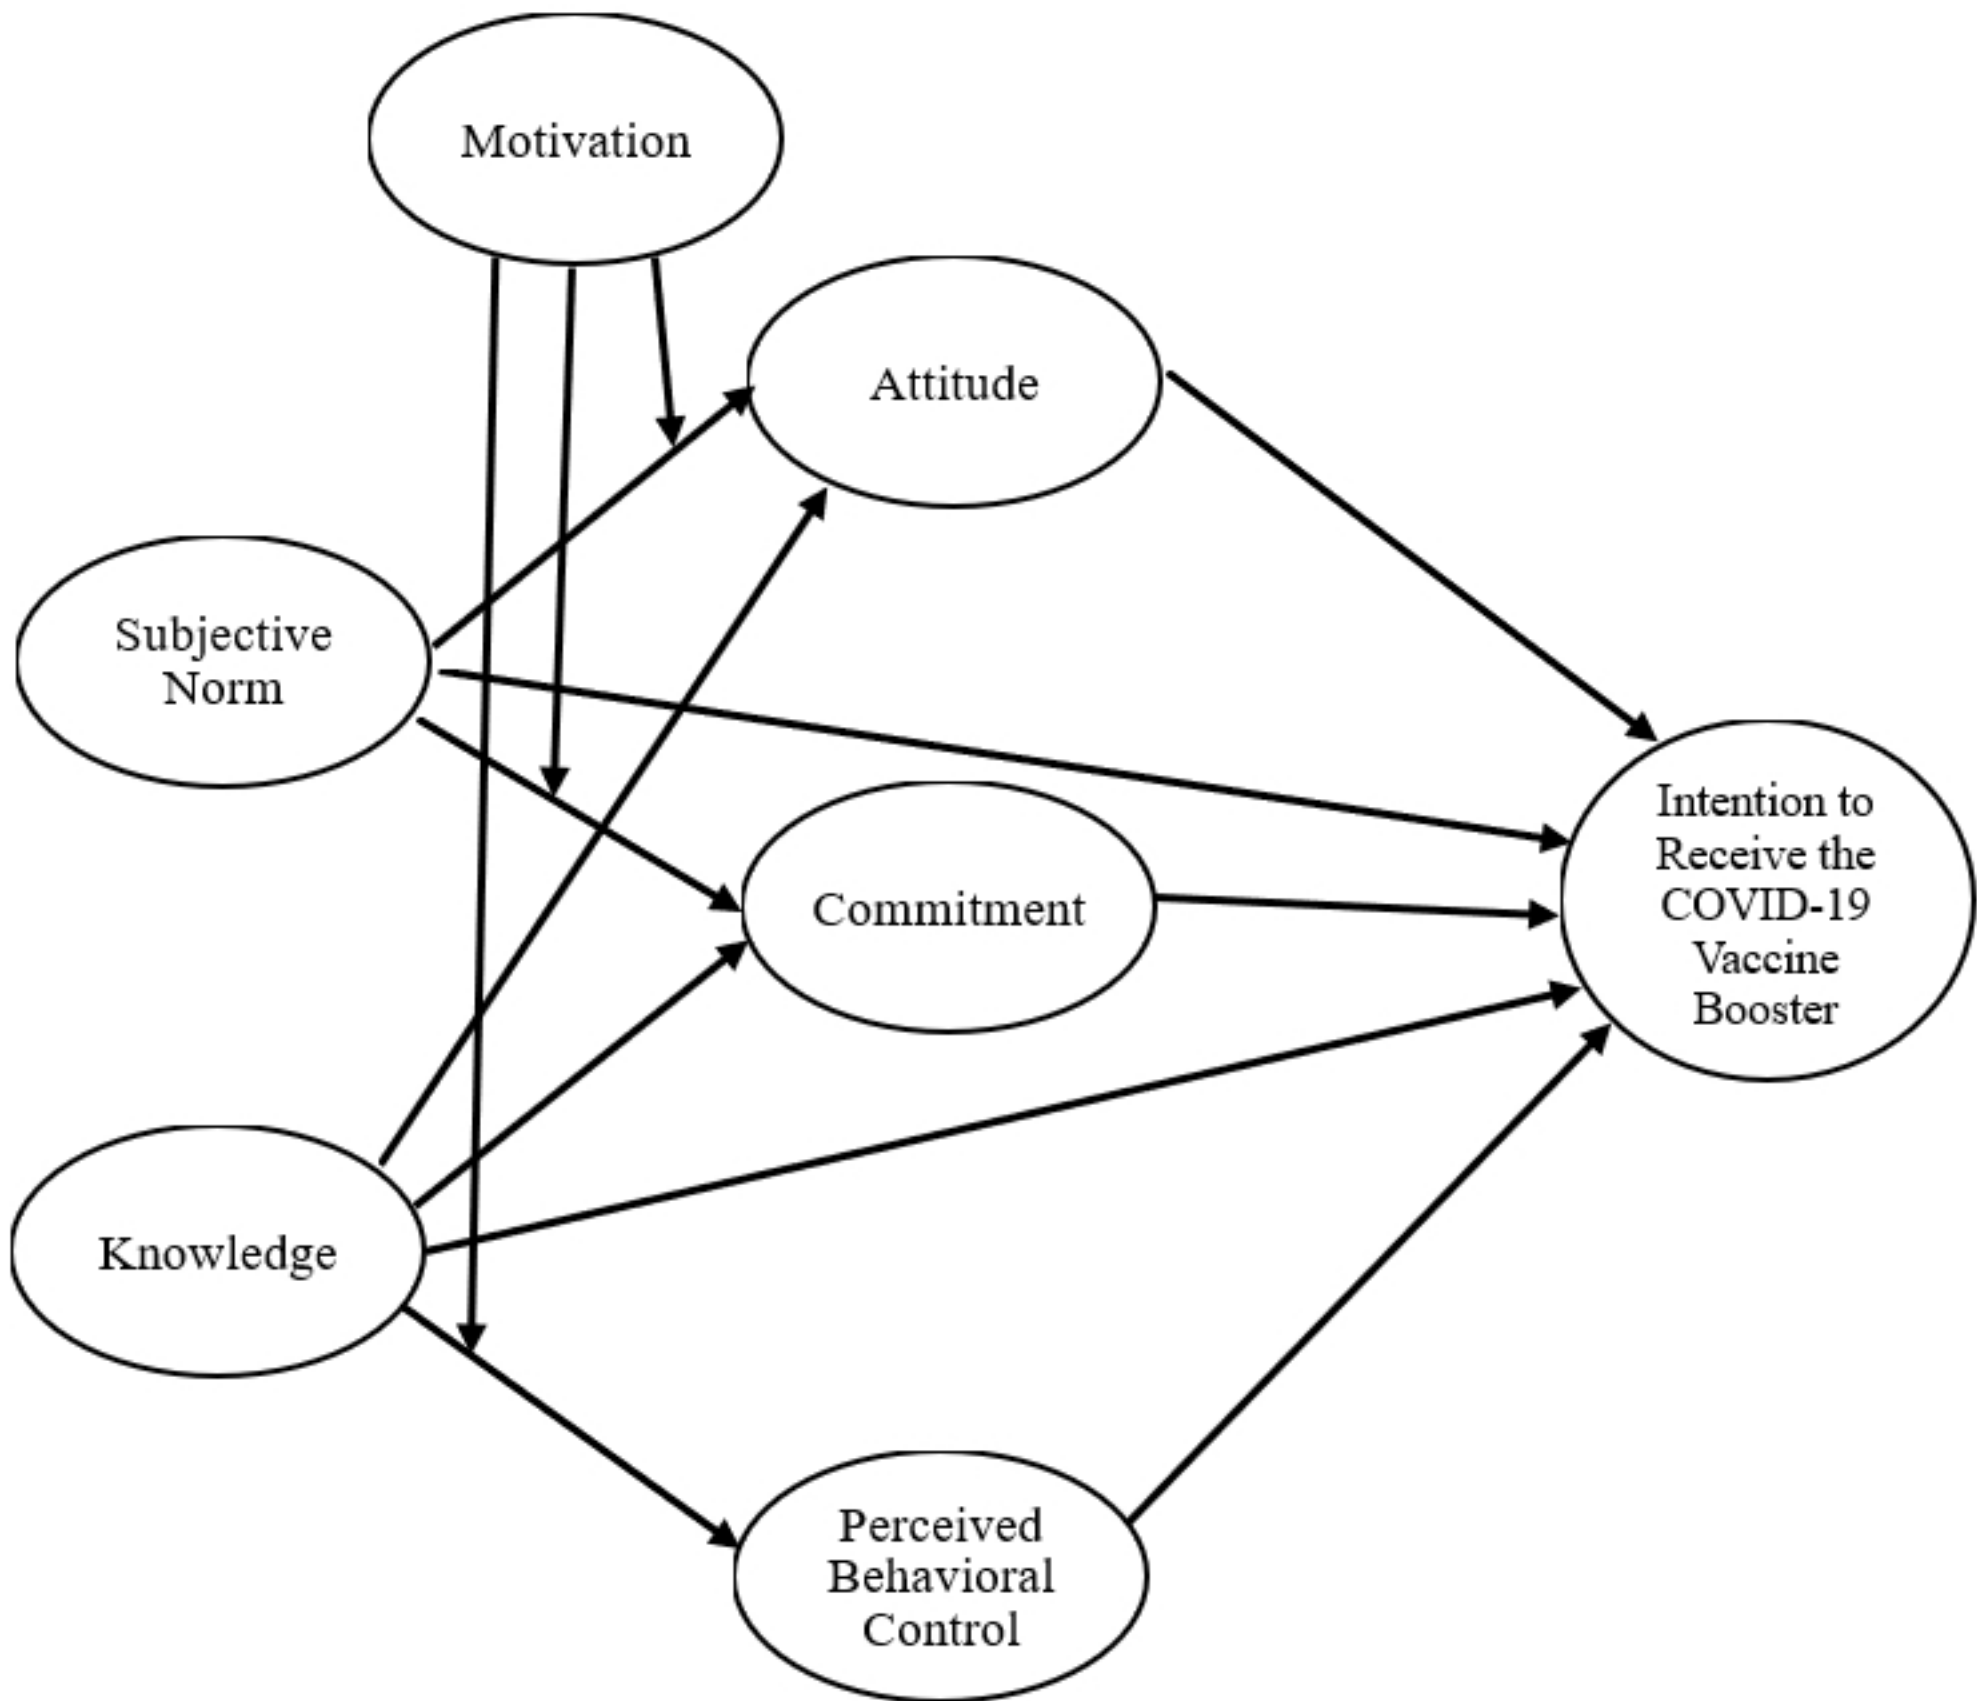

Figure 1. The framework of integrating SOP and TPB model

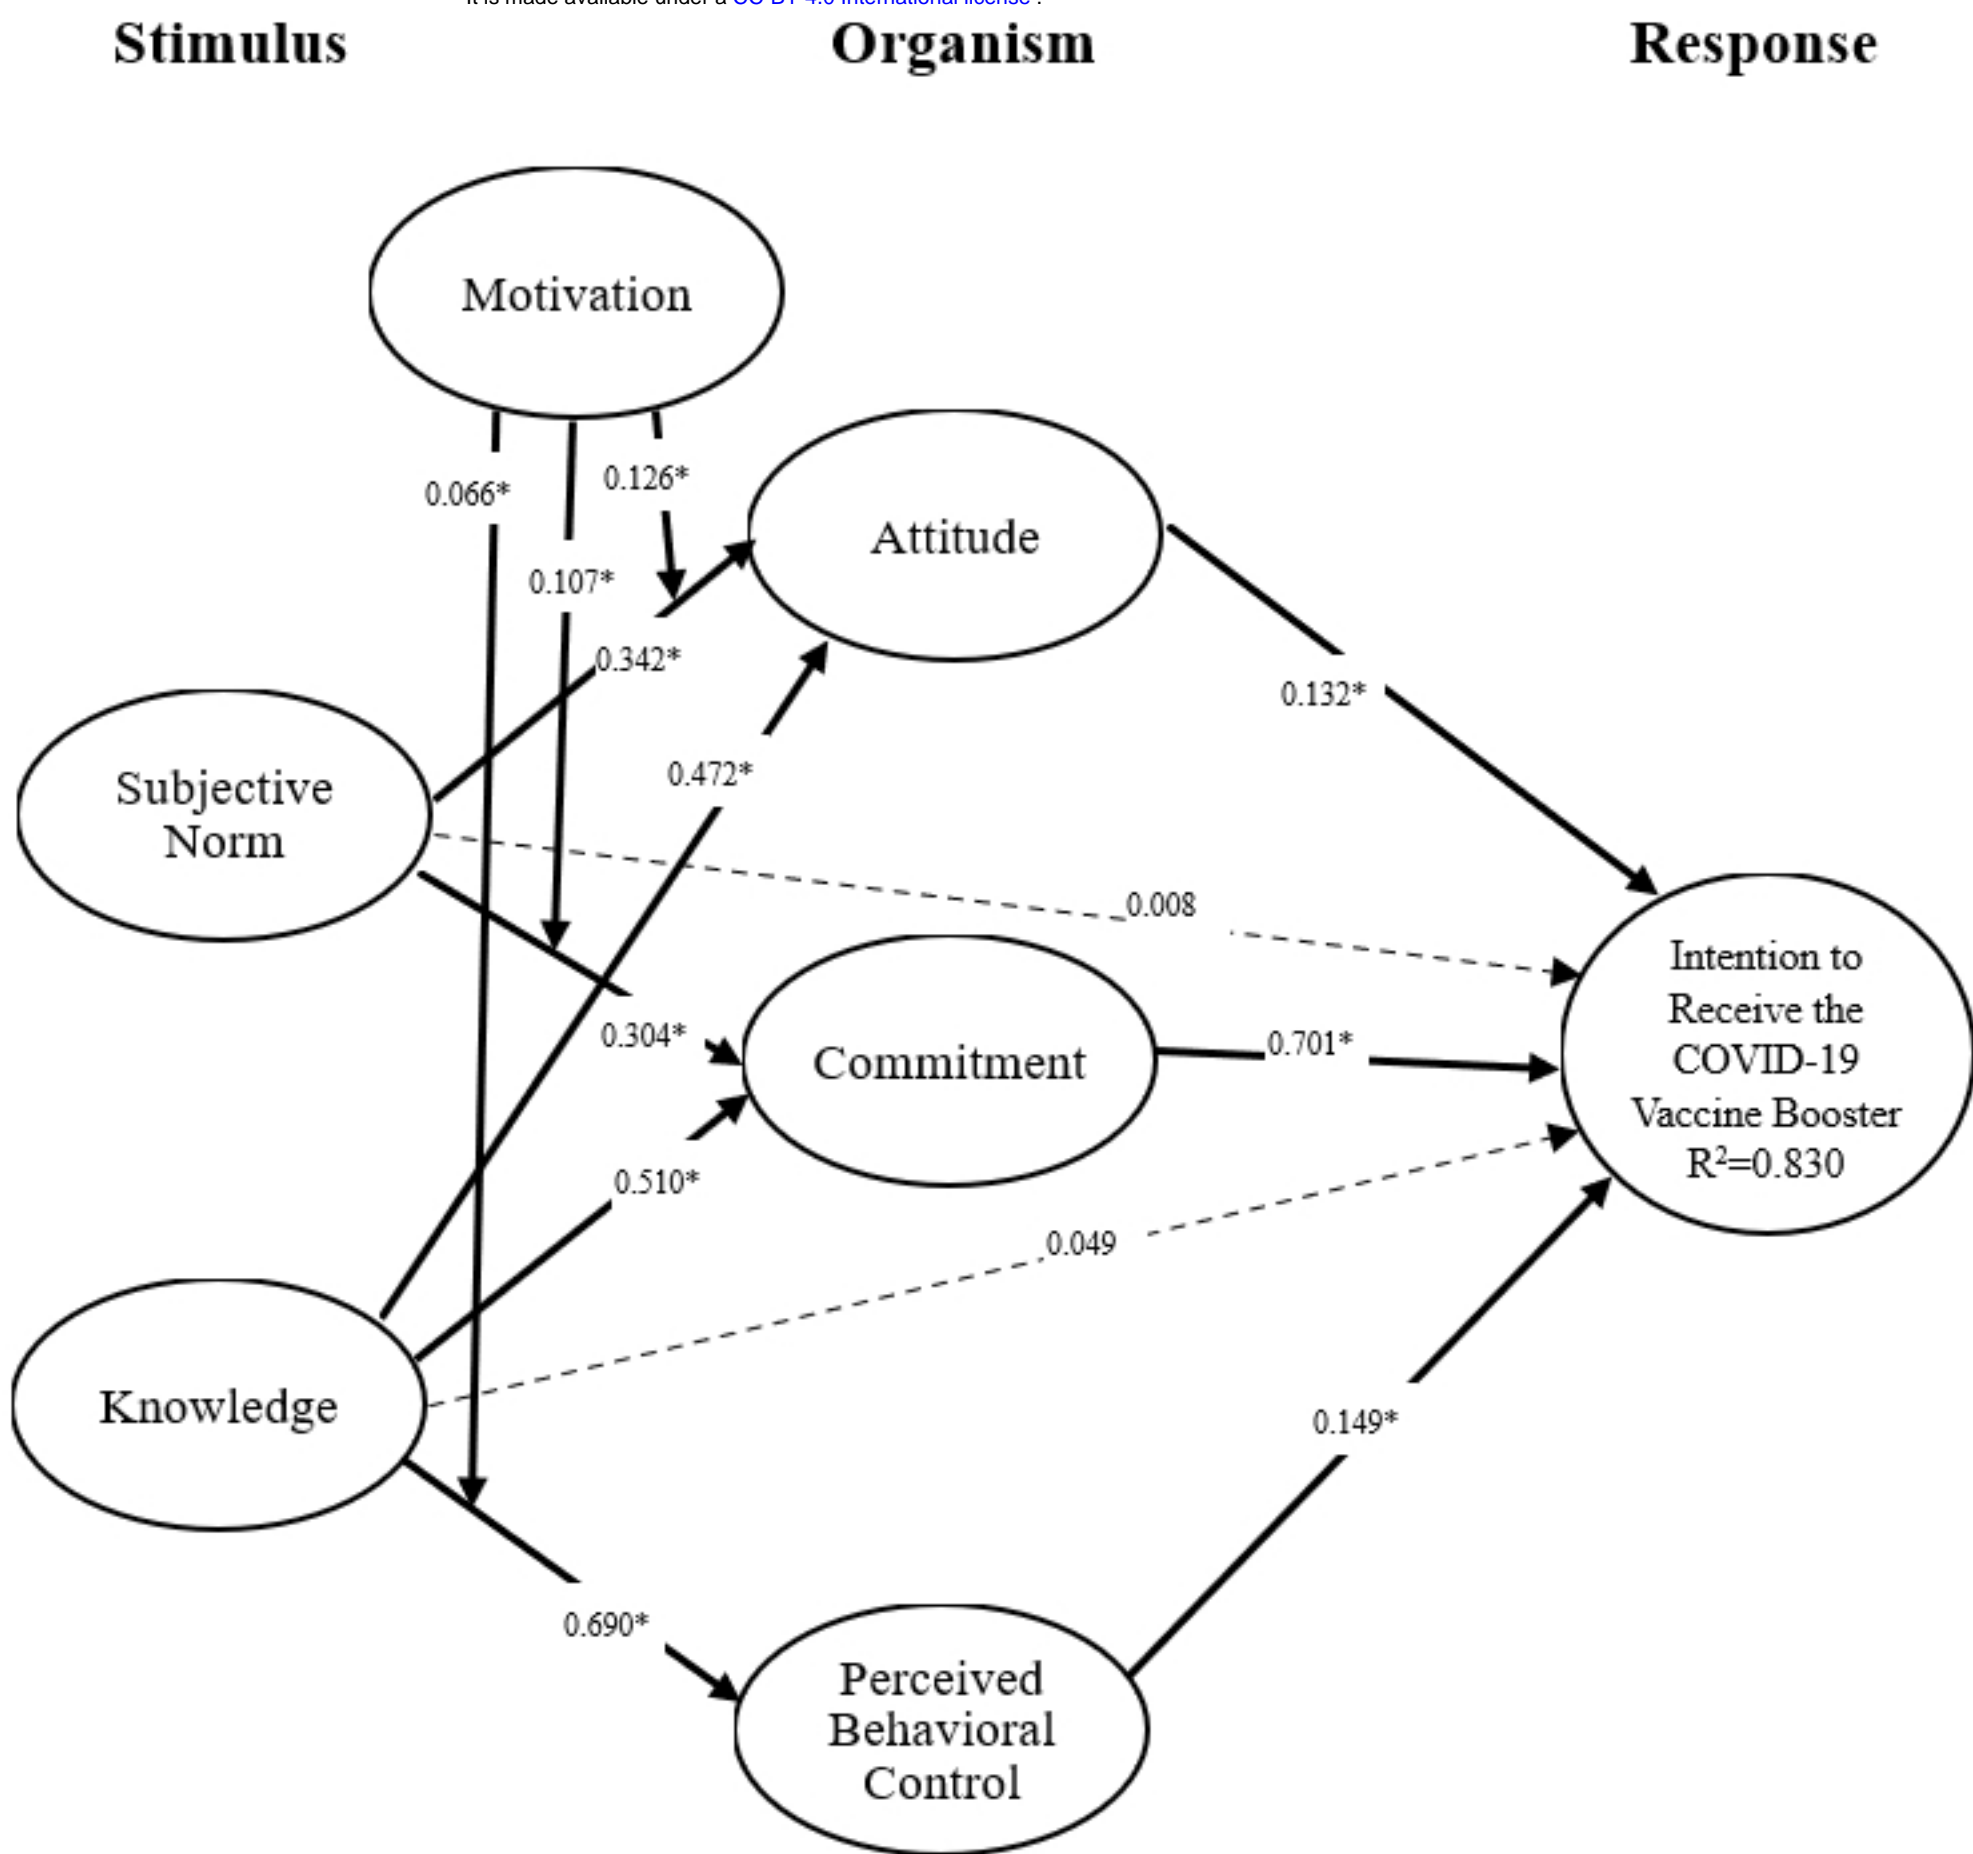

Figure 2. The results of integrating SOP and TPB model

Figure 2. The results of integrating SOP and TPB model
